# Supplementary material
Source: PubMed Central journal article supplement (PMC6759736)
Supplement: ba024026-suppl1.pdf [file ba024026-suppl1.pdf]

### CXCL1

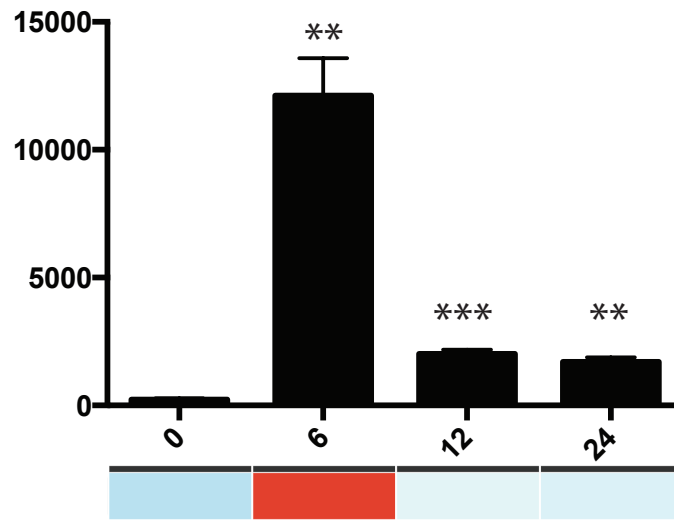

### CCL2

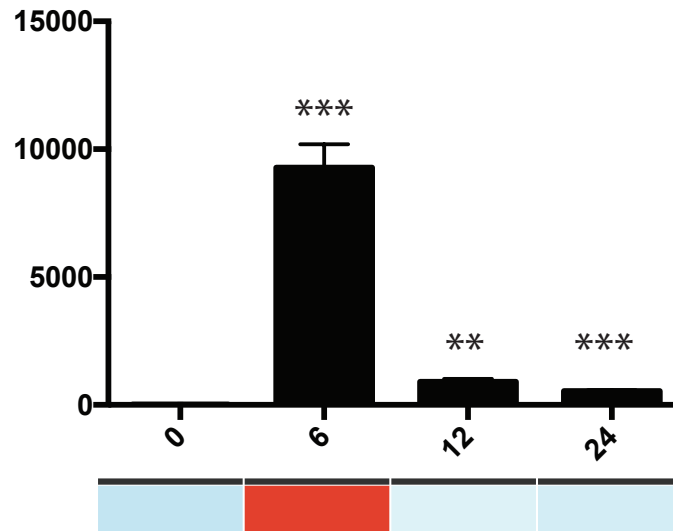

### CXCL2

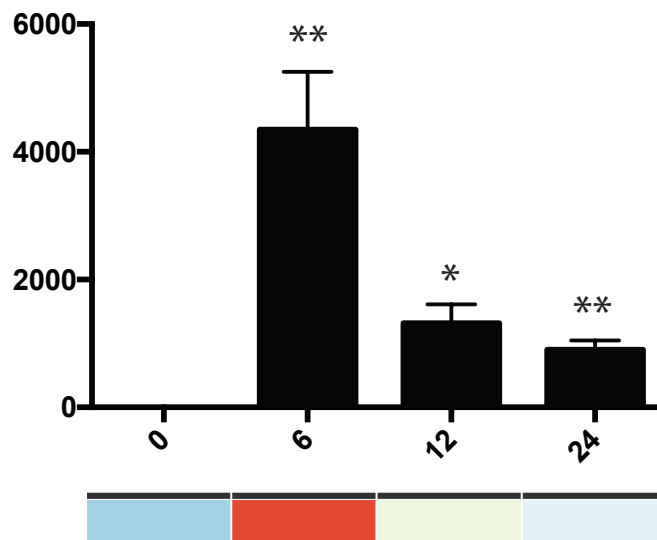

### **Supplementary Figure 1: Mesothelial cytokine transcript levels during adhesion formation**

Transcript expression levels (FPKM) of CXCL1, MCP-1, and CXCL2 from injured mesothelium 0, 6, 12, and 24 hours post button placement. Error bars are SEM; \* $p < 0.05$ , \*\* $p < 0.005$ , \*\*\* $p < 0.0005$ .

**CXCL1**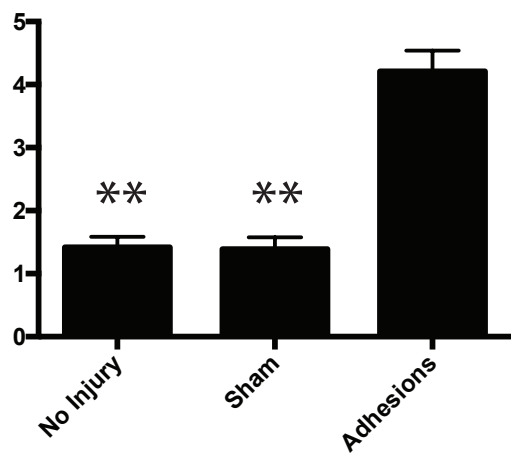**MIP1B**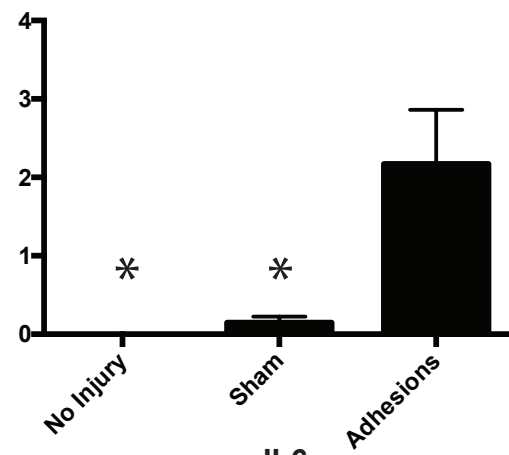**CCL2**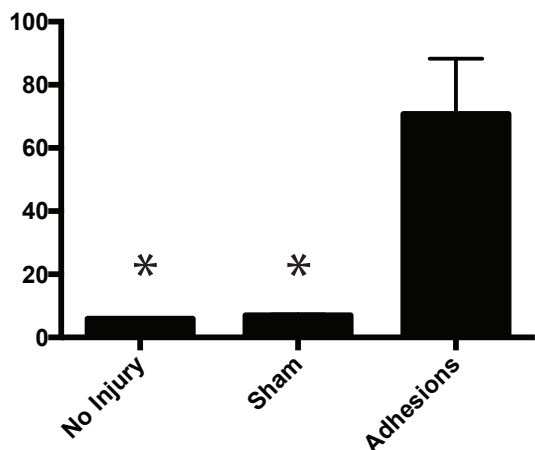**IL6**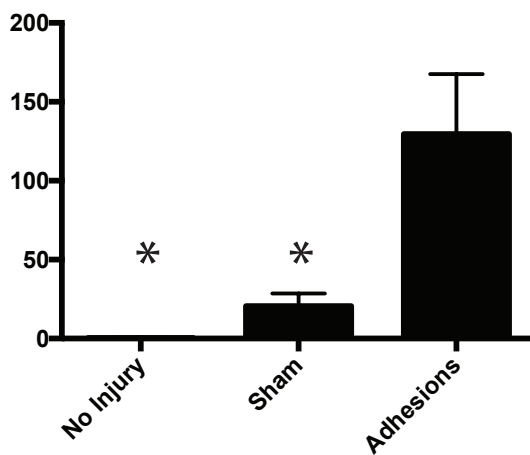**CXCL2**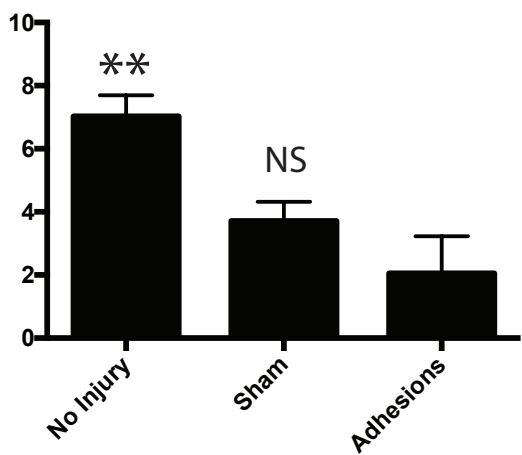**IL18**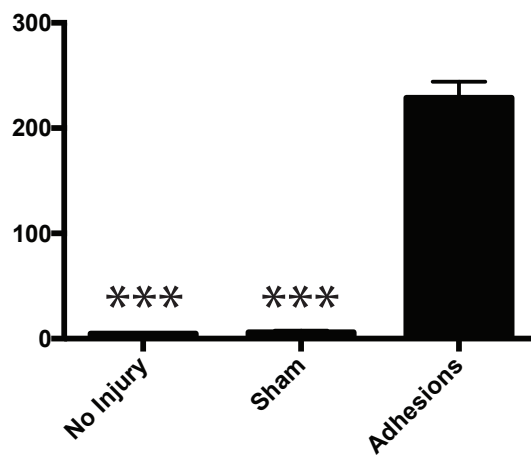**Eotaxin**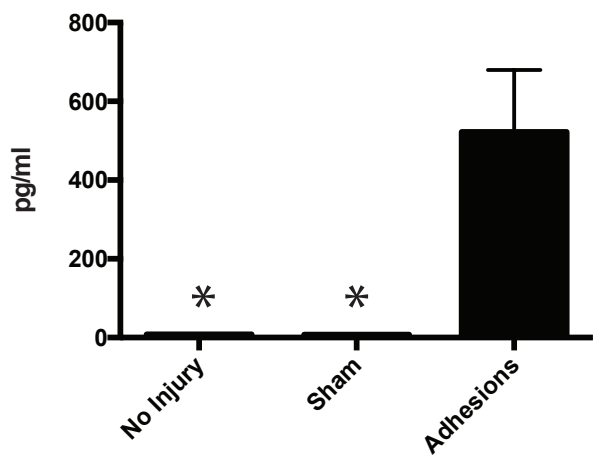

pg/ul

pg/ml

**Supplementary Figure 2: Mesothelial cytokine secretion during adhesion formation**

Protein levels (pg/ul) of cytokines in uninjured mice and mice receiving either sham (peritoneal lapratomy and closure) or adhesion surgeries. Error bars are SEM; \*p<0.05, \*\*p<0.005, \*\*\*p<0.0005; NS = not significant.

# A

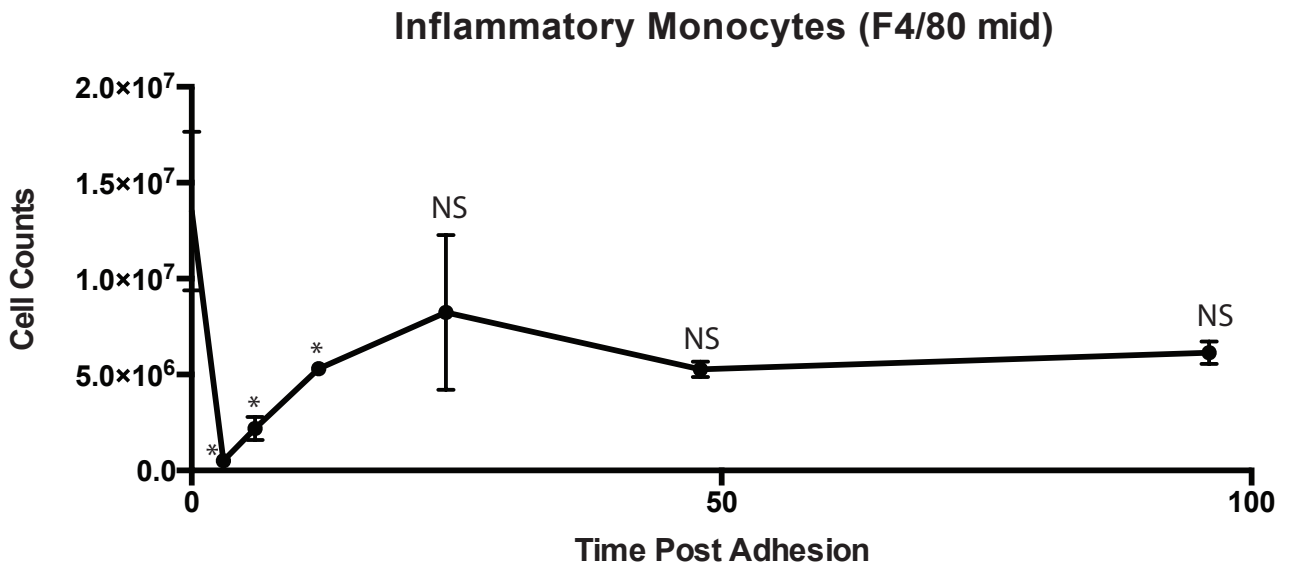

# B

### Myeloid Population in Adhesion Formation

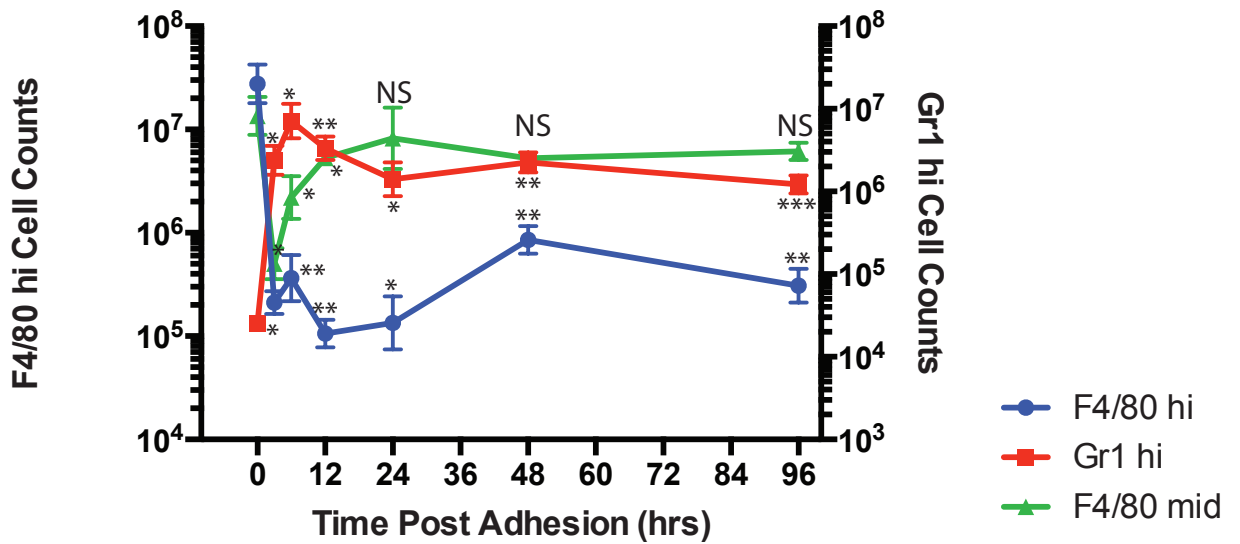

### **Supplementary Figure 3: Inflammatory Monocytes Infiltrate into the Peritoneum Following Injury**

**A** Characterization of myeloid population from 0 to 96 hours following adhesion formation: Absolute numbers of inflammatory monocytes (CD11b+F4/80mid) were analyzed at each time point. **B** Absolute numbers of inflammatory monocytes (CD11b+F4/80mid), tissue resident macrophages (CD11b+F4/80hi), and neutrophils (Gr1+) at each time point. \* $p < 0.05$ , \*\* $p < 0.005$ , \*\*\* $p < 0.0005$ ; NS = not significant.

# Peritoneal Composition

## A

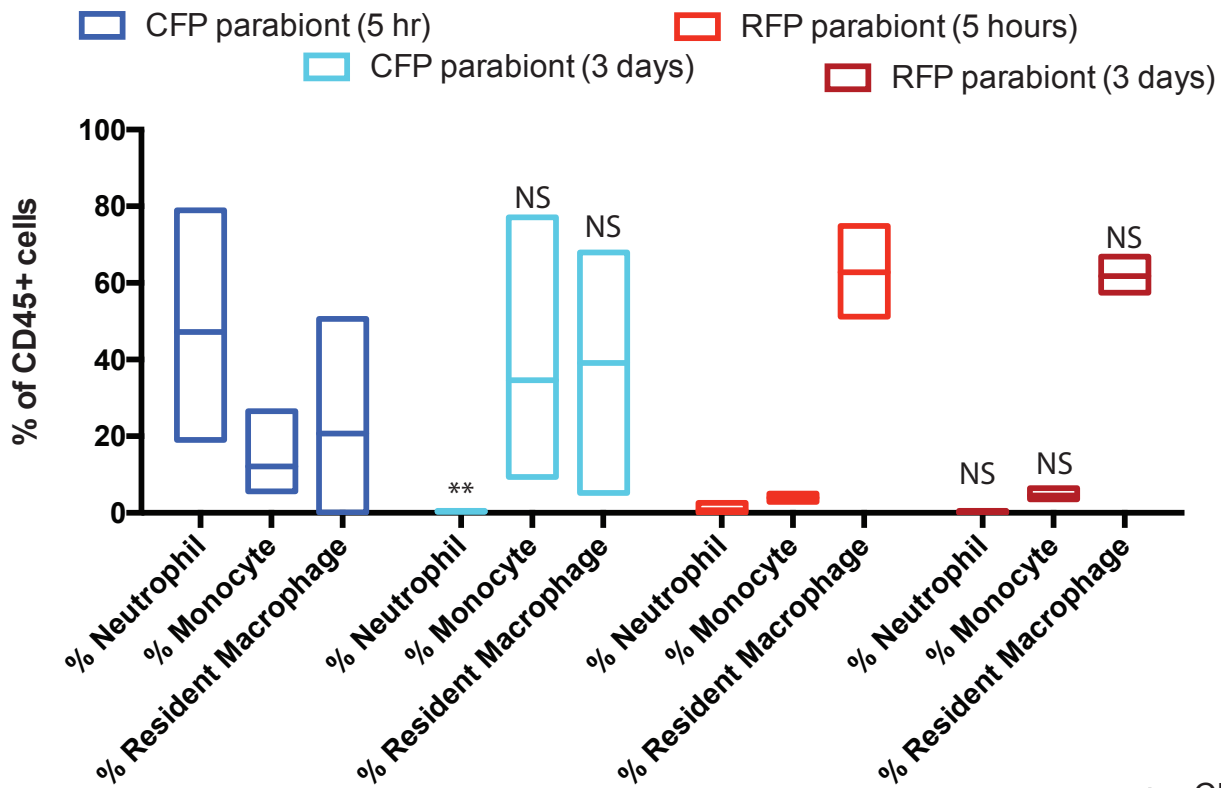

## B

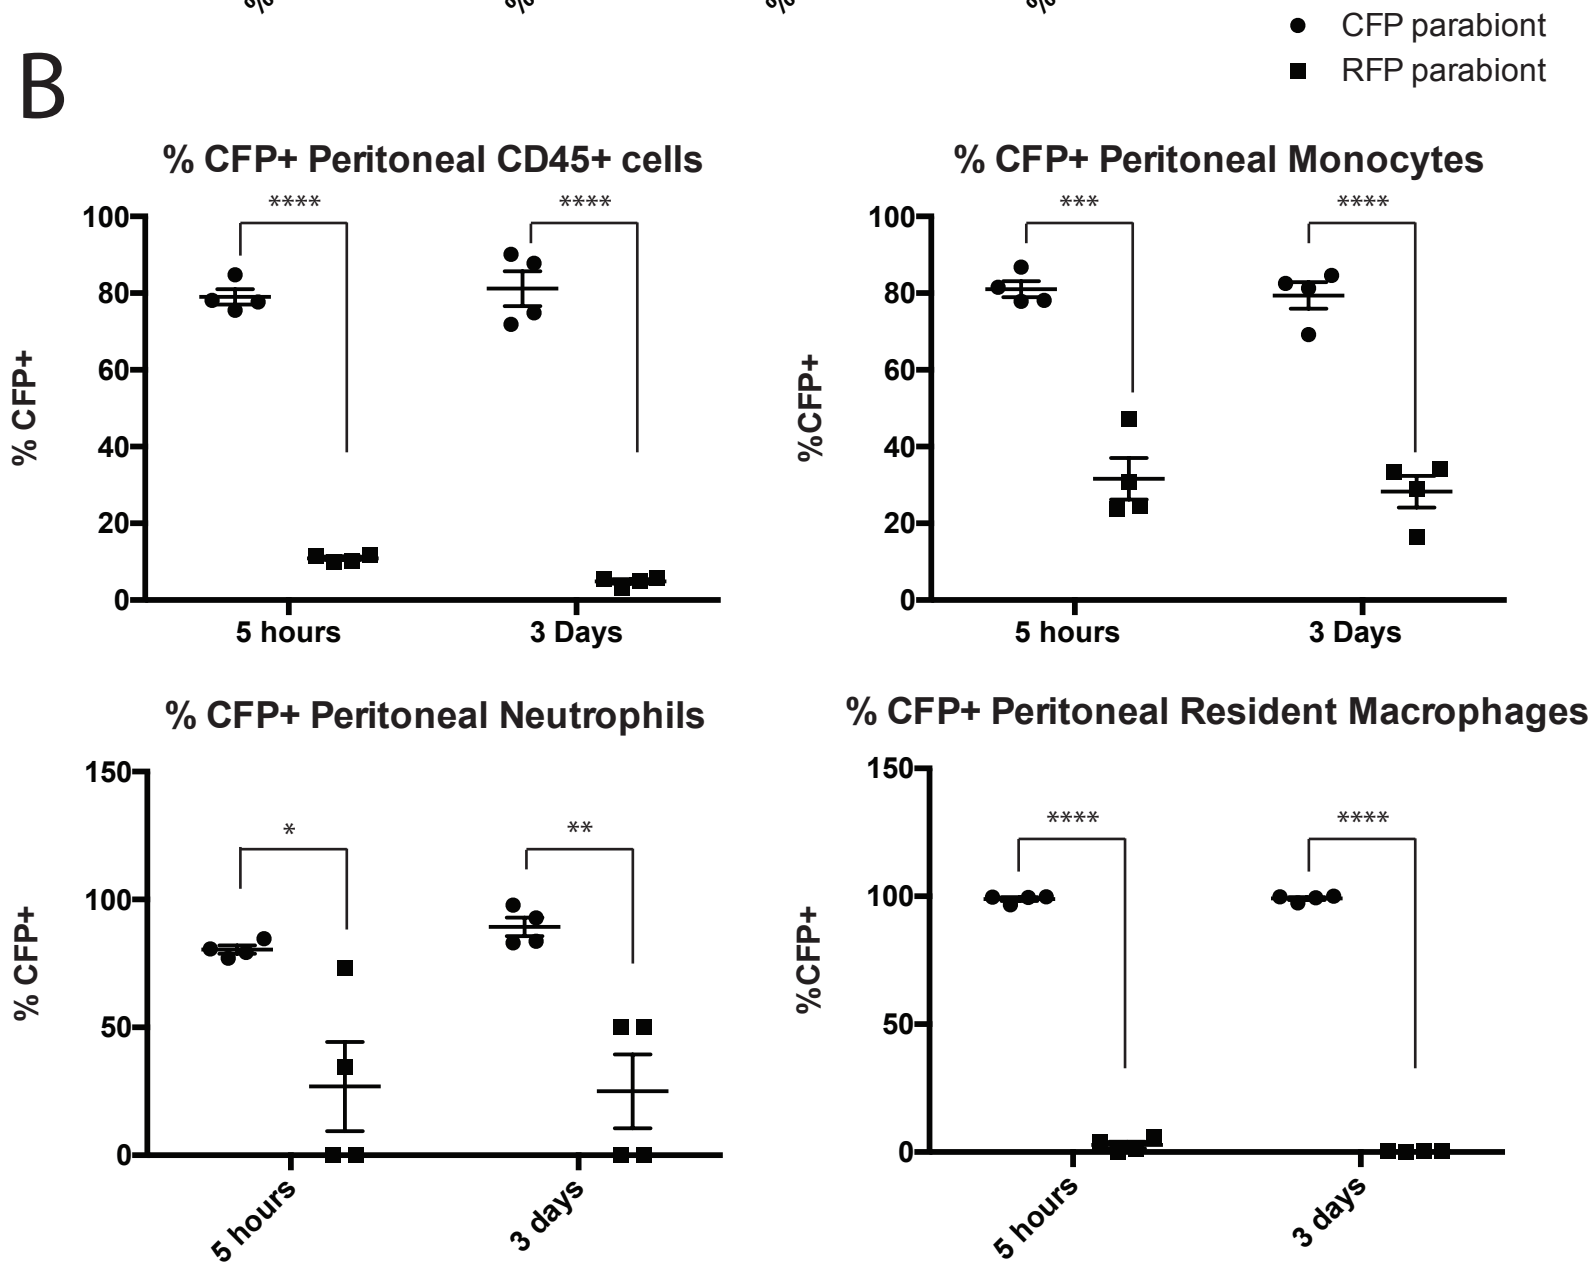

**Supplementary Figure 4: Myeloid composition of peritoneum following thioglycollate injection in parabiotic mice**

**A** Percent neutrophils, monocyte, or macrophage of total CD45+ cells in the peritoneum 5 hours or 3 days following thioglycollate administration in parabiotic mice. **B** Percent CFP+ neutrophils, macrophages, or monocytes in CFP mouse from the parabiotic pair 5 hours or 3 days following thioglycollate administration. \* $p < 0.05$ , \*\* $p < 0.005$ , \*\*\* $p < 0.0005$ ; NS = not significant.



**A****Blood composition**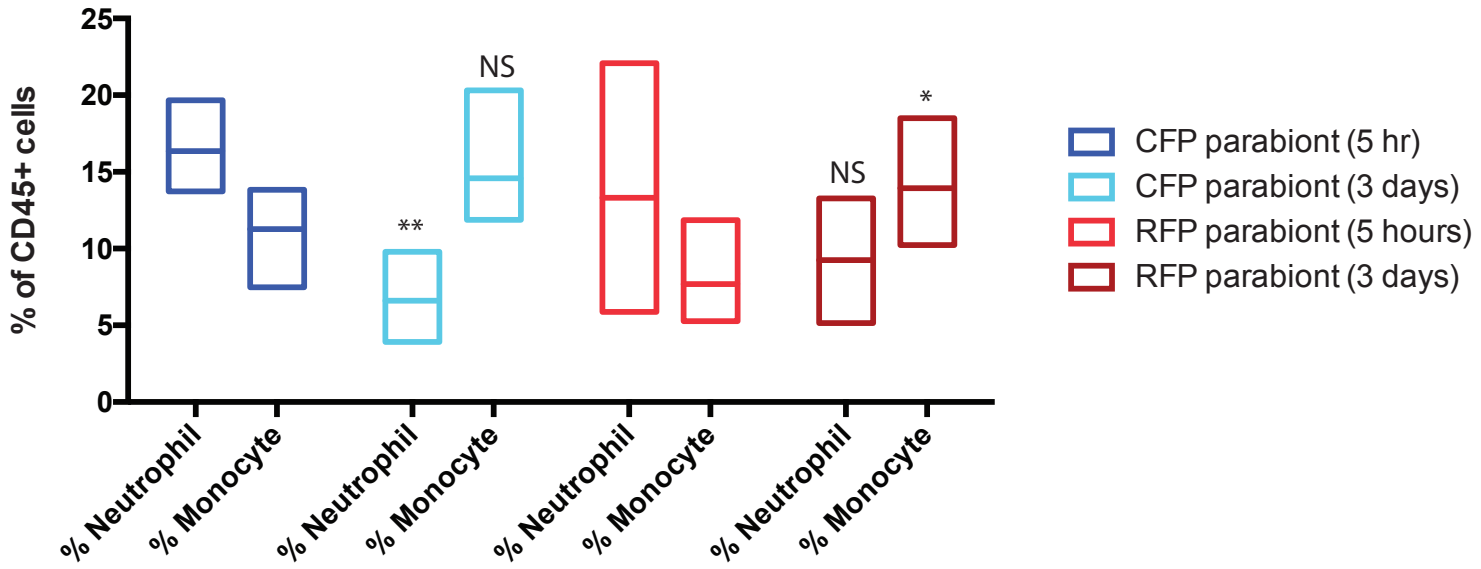**B****% CFP+ Blood Neutrophil**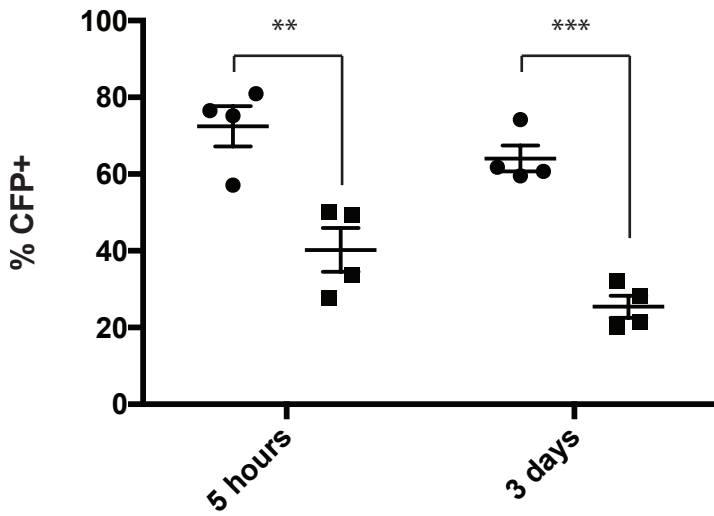**%CFP+ Blood Monocyte**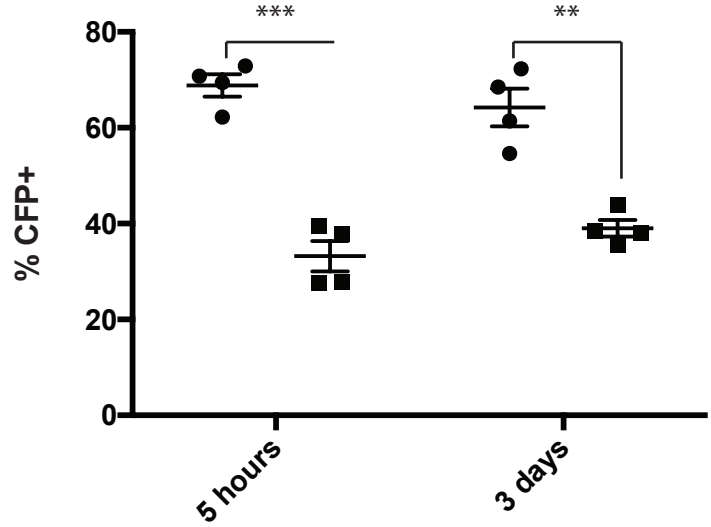**%CFP+ Blood CD45+**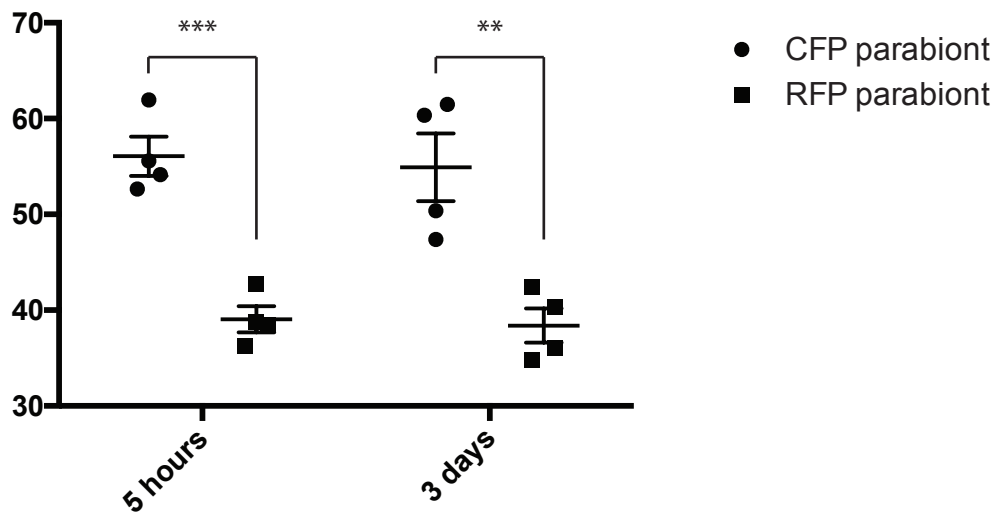

**Supplementary Figure 5: Myeloid composition of blood following thioglycollate injection in parabiotic mice**

**A** Percent neutrophils or monocyte of total CD45+ cells 5 hours or 3 days in circulation following thioglycollate administration in parabiotic mice. **B** Percent CFP+ neutrophils, macrophages, or monocytes in CFP mouse from the parabiotic pair 5 hours or 3 days following thioglycollate administration. \* $p < 0.05$ , \*\* $p < 0.005$ , \*\*\* $p < 0.0005$ ; NS = not significant.

### Ratio CFP+ Peritoneal:CFP+ Blood

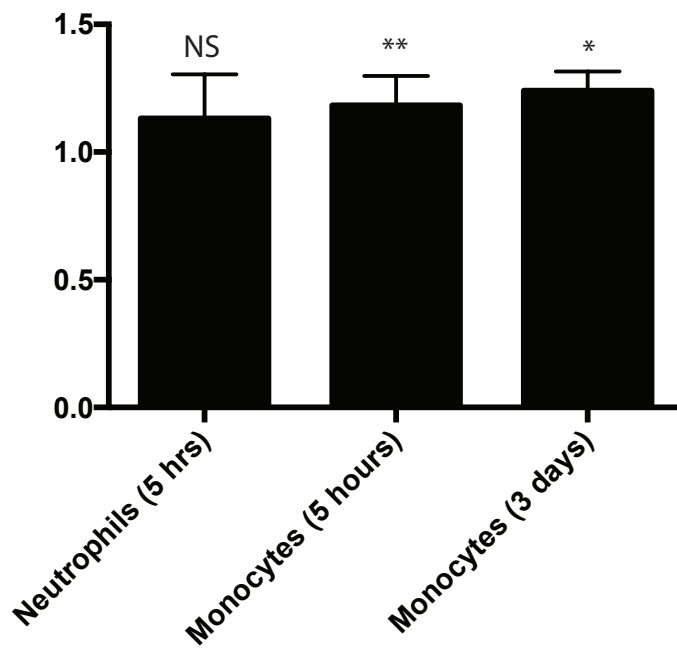

■ Cell type CFP chimerism enrichment in peritoneum over blood

**Supplementary Figure 6: Relative distribution of myeloid compartment in blood and peritoneum**

Ratio of CFP+ neutrophils or monocytes in peritoneum versus blood. \* $p < 0.05$ , \*\* $p < 0.005$ , \*\*\* $p < 0.0005$ ; NS = not significant.

A

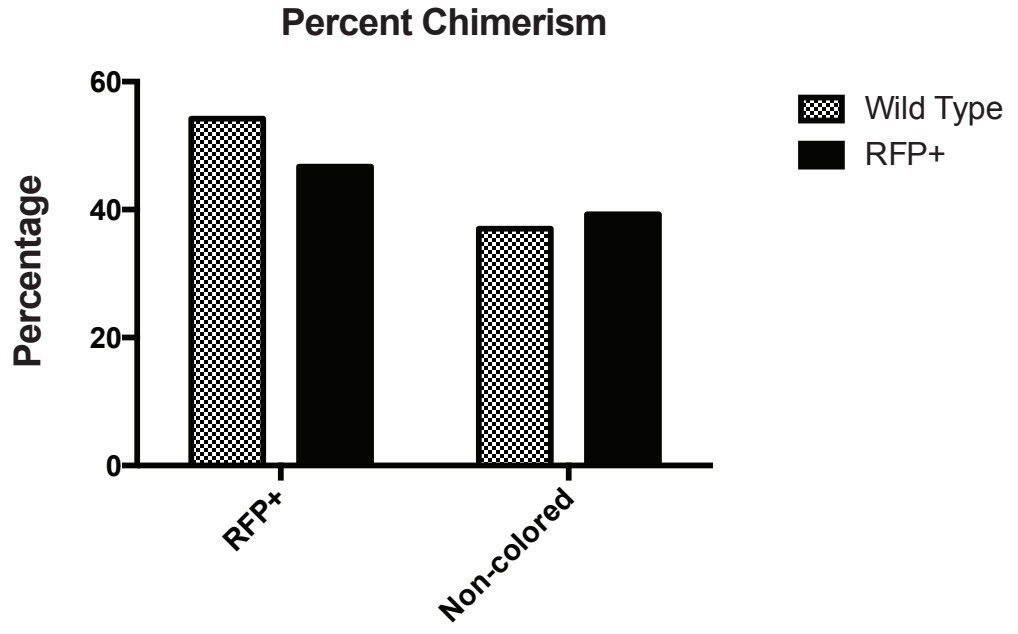

B

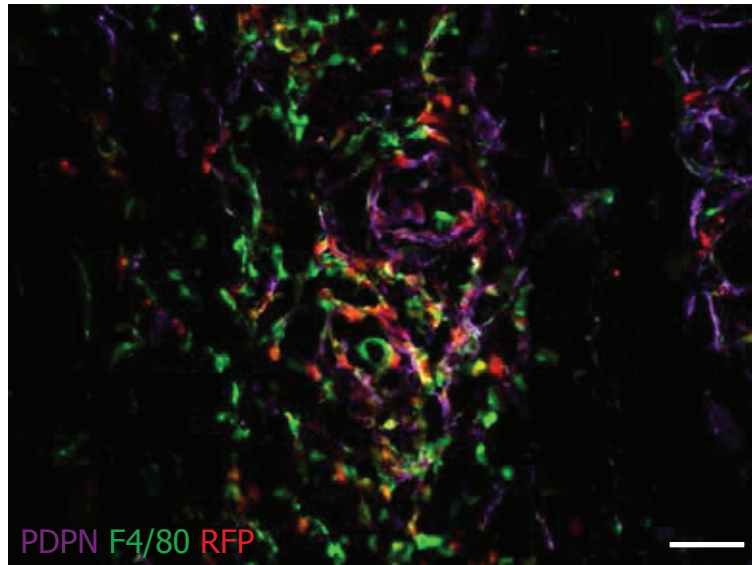

**Supplementary Figure 7: Parabiotic mice suggest circulating inflammatory cells contribute to adhesion formation**

**A** Blood from wild type, red parabionts was analyzed via flow cytometry for chimerism (percent uncolored and red cells in each parabiont). **B** Composite immunofluorescence staining for PDPN and F4/80 of adhesions from wild type mice of a wild type / RFP<sup>+</sup> parabionts pair. All scale bars are 100  $\mu\text{m}$ .

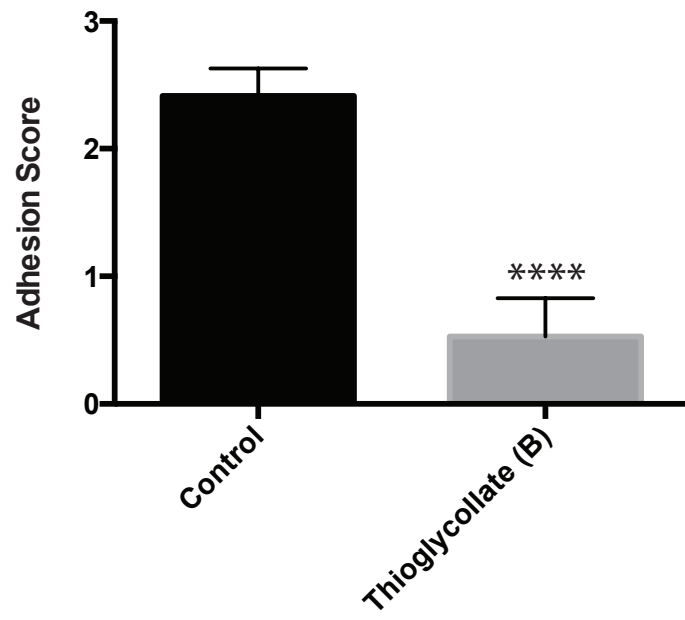

**Supplementary Figure 8: Thioglycollate administration significantly reduces adhesion formation**

Adhesion scoring of adhesion induced mice treated with thioglycollate (n = 17) versus vehicle controls (n = 63). \*\*\*\*p<0.0001; NS = not significant.



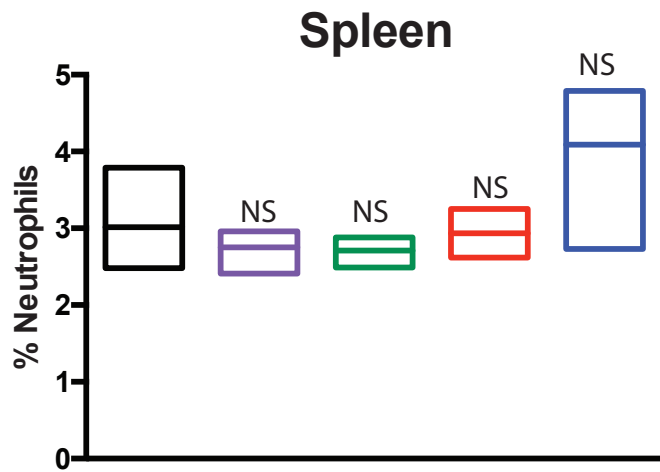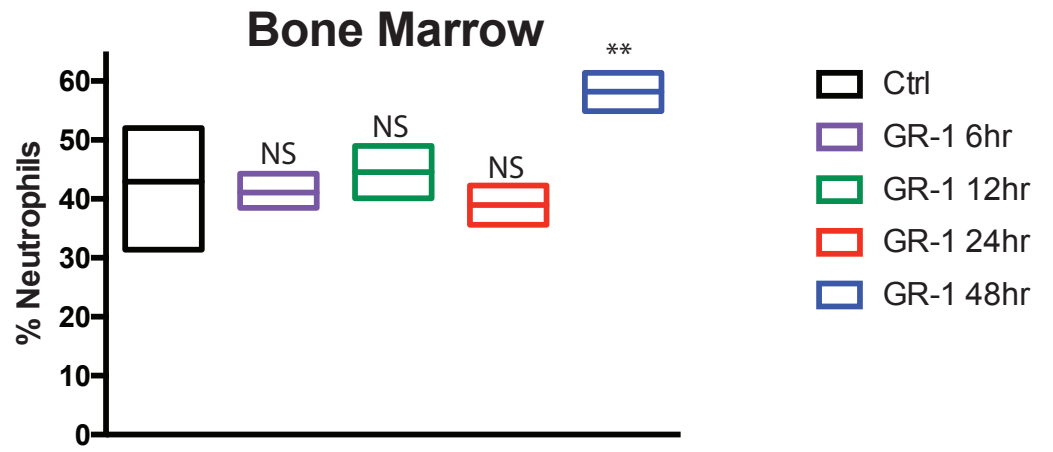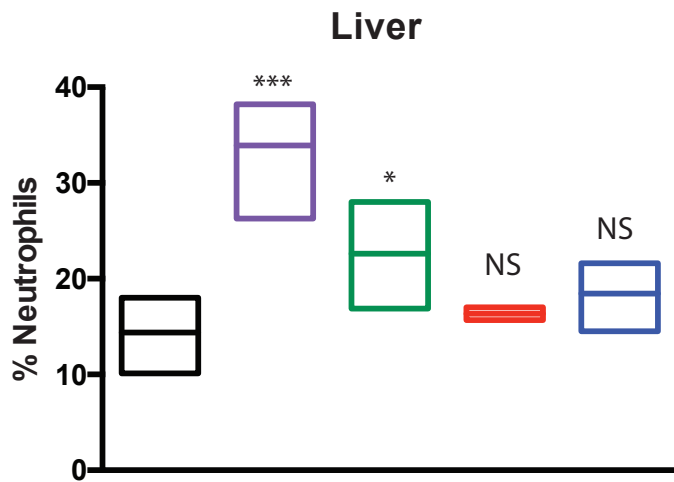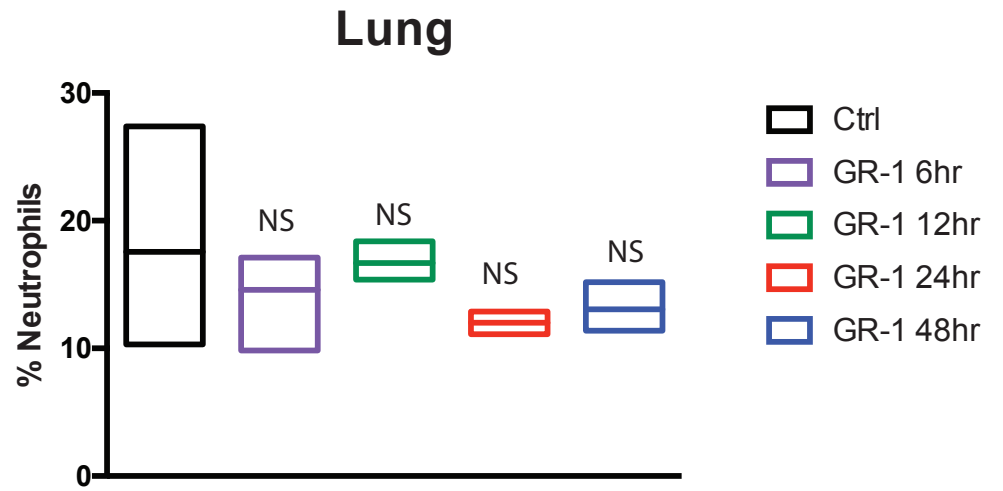

**Supplementary Figure 9: Effect of anti-GR1 on neutrophil compartments**

Percentage of neutrophils in spleen, bone marrow, lung, and liver 6, 12, 24, and 48 hours following anti-Gr-1 administration. \* $p < 0.05$ , \*\* $p < 0.005$ , \*\*\* $p < 0.0005$ ; NS = not significant.

H3Cit

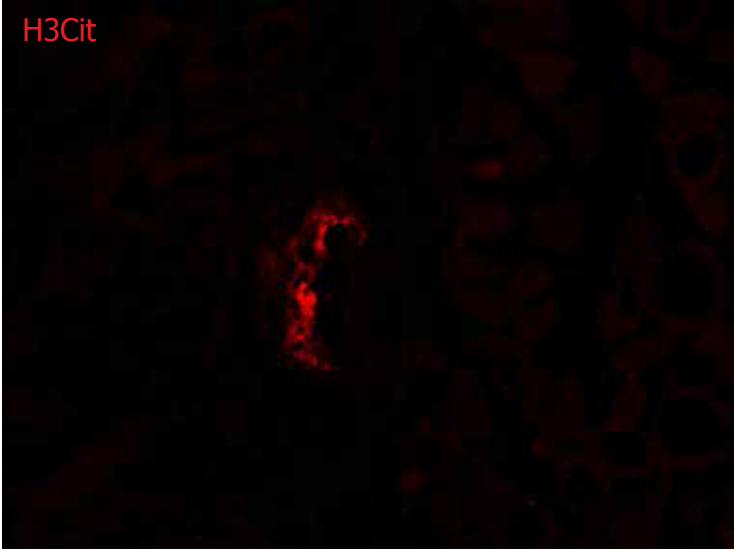

Gr-1

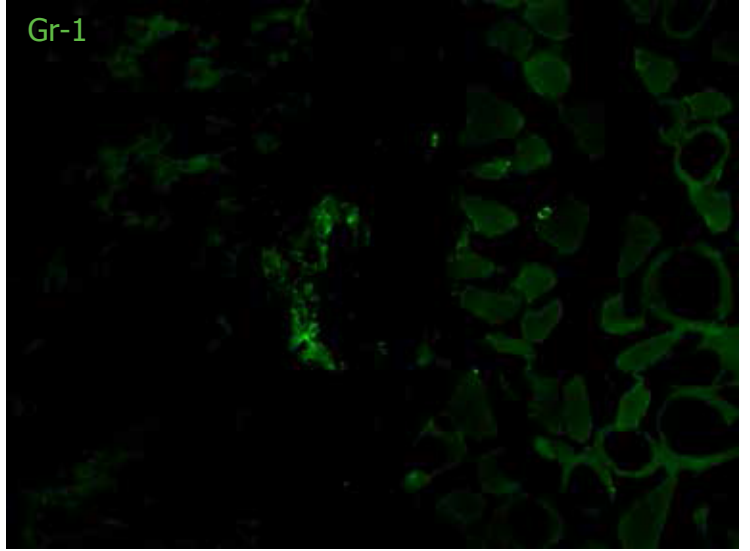

Hoechst

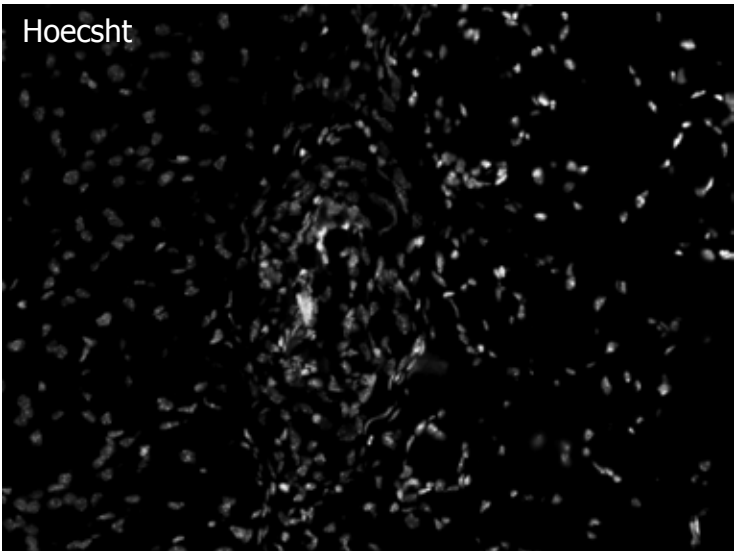

Composite

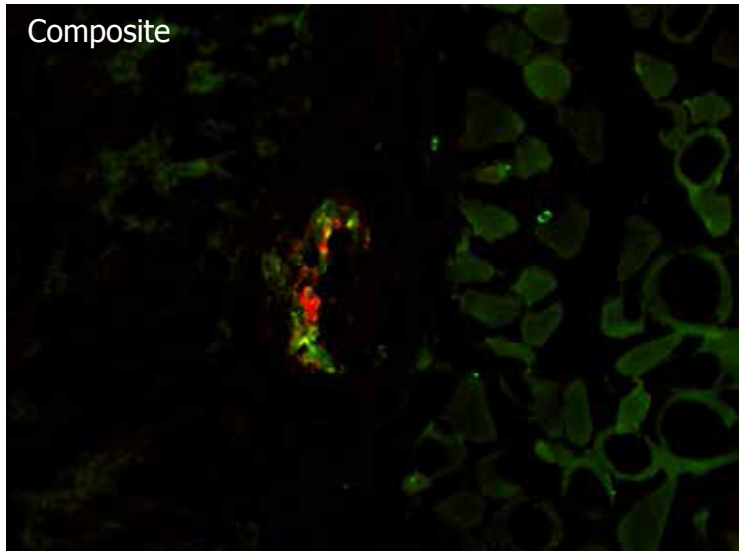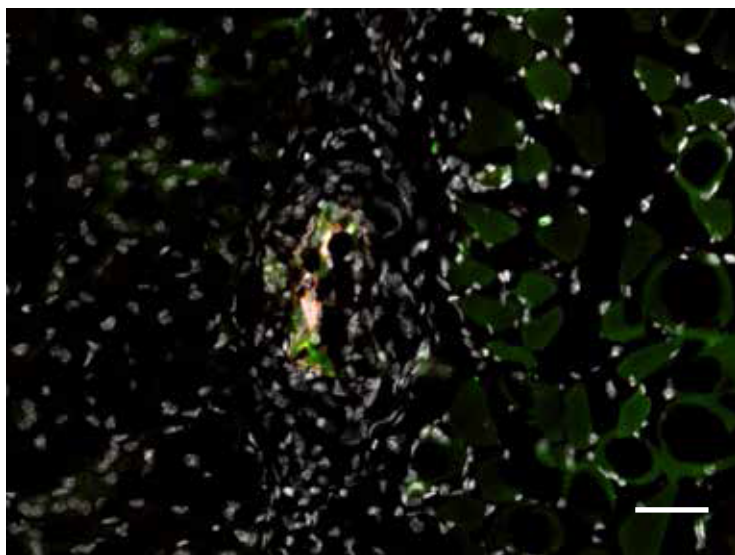

**Supplementary Figure 10: NETs play a role in adhesion induction and are associated with GR1+ cells**

Single and composite immunofluorescence staining for H3Cit, Gr-1, and Hoescht in adhesion tissue 7 days following adhesion induction. All scale bars are 100  $\mu\text{m}$ .

### Adhesion Severity in PADI4-Deficient Mice

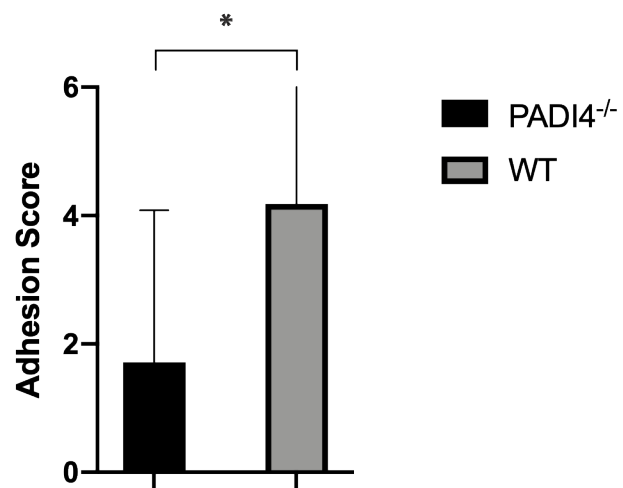

**Supplementary Figure 11: Adhesions in PADI4<sup>-/-</sup> Mice are less severe**

Adhesion scoring of adhesion induced in PADI4<sup>-/-</sup> mice (n = 14) versus controls (n = 11). \*p<0.05.
